# Supplementary material for: Towards the computational modelling of polyoxoanions on metal surfaces: IR spectrum characterisation of [SiW12O40]4− on Ag(111)
Source: Royal Society of Chemistry journal article supplement (doi:10.1039/c0cp02602f), 2011-01-01
Supplement: c0cp02602f.pdf [file c0cp02602f.pdf]

## Supporting Information

### Adsorption of $[\text{SiW}_{12}\text{O}_{40}]^{4-}$ on the Ag(111)

### Surface: The IR Spectrum

*Xavier Aparicio-Anglès,<sup>a</sup> Anna Clotet,<sup>a\*</sup> Carles Bo,<sup>a,b</sup> Josep M. Poblet<sup>a\*</sup>*

<sup>a</sup> Departament de Química Física i Inorgànica, Universitat Rovira i Virgili, C/  
Marcel·lí Domingo s/n, 43007 Tarragona, Spain. <sup>b</sup> Institut Català d'Investigació  
Química (ICIQ), Av/ Països Catalans 16, 43007 Tarragona, Spain

\* [anna.clotet@urv.cat](mailto:anna.clotet@urv.cat); [josepmaria.poblet@urv.cat](mailto:josepmaria.poblet@urv.cat)

**Figure S1.** Adsorbate unit cell using matrix notation. The length of the surface unit cell vectors  $\mathbf{a}_1$  and  $\mathbf{b}_1$  is related to the bulk unit cell parameter,  $a_{\text{bulk}}$ . The Ag bulk parameter has been optimized at 4.15876 Å.<sup>i</sup> The length of the adsorbate unit cell vectors  $\mathbf{a}_2$  and  $\mathbf{b}_2$  is 10.6028 Å. The angle between vectors  $\mathbf{a}_2$  and  $\mathbf{b}_2$  is 92.9° (almost square unit cell). The angle between vectors  $\mathbf{a}_2$  and  $\mathbf{a}_1$  is 13.9°.

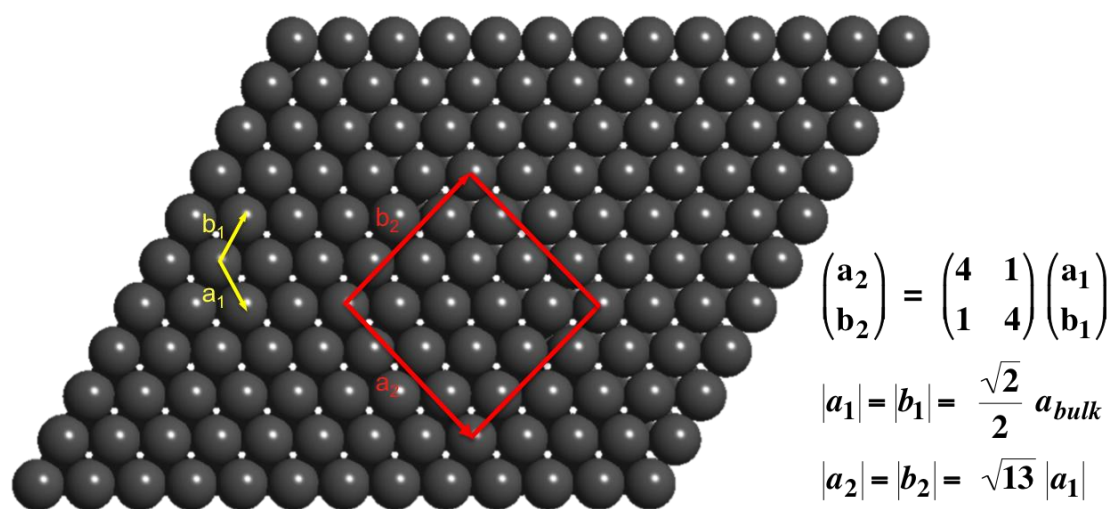

### Vibrational normal modes visualization

Supporting information includes a set of .xyz files. Each file corresponds to different vibrational normal modes (VNM). The name of the files are the corresponding wavenumber associated with the VNM and, if it is necessary, the intensity of the band. The list of files is:

1011-11.xyz  
1011-23.xyz  
1002.xyz  
1001.xyz  
940.xyz  
916.xyz  
881.xyz

851.xyz  
805.xyz  
518.xyz  
483.xyz  
378.xyz  
305.xyz  
299.xyz  
254.xyz

Each VNM can be visualized using “Jmol” code<sup>ii</sup>. With this open-source the VNM can be viewed as a set of static displacement vectors (select Vectors...) or/and as an animated mode (select Vibration).

## References

---

<sup>i</sup> Martorell, B.; Clotet, A.; Fraxedas, J. A First Principle Study of the Structural, Vibrational and Electronic Properties of Tetrathiafulvalene Adsorbed on Ag(110) and Au(110) Surfaces. *J. Comput. Chem.* **2010** *31*, 1842-1852.

<sup>ii</sup> Jmol: an open-source Java viewer for chemical structures in 3D.  
<http://www.jmol.org/>
